# Supplementary material
Source: publisher site journal article supplement (https://www.dovepress.com/article/424759)
Supplement: Supplementary file 1 [file get_supplementary_file.php]

**Supplementary Online Content**

**Patient Characteristics and Clinical and Economic Outcomes Associated with Unplanned Medical and Surgical ICU Admissions**

**Table S1**. Most common patient care pathways for medical patients with and without unplanned ICU admission after matching.

**Table S2**. Most common primary diagnoses for medical patients with and without unplanned ICU admission after matching.

**Table S3.** Most common patient care pathways for surgical patients with and without unplanned ICU admission after matching.

**Table S4.** Most common primary diagnoses for surgical patients with and without unplanned ICU admission after matching.

**Table S5.** Distribution of CCI comorbidities for medical patients with and without unplanned ICU admission before risk adjustment matching.

**Table S6.** Medical patient and hospital characteristics after risk adjustment matching.

**Table S7.** Distribution of CCI comorbidities for surgical patients with and without unplanned ICU admission before risk adjustment matching.

**Table S8.** Surgical patient and hospital characteristics after risk adjustment matching.

**Table S1**. Most common patient care pathways for medical patients with and without unplanned ICU admission after matching.

| **Medical Patients with Unplanned ICU Admission** | | **Medical Patients without Unplanned ICU Admission** | |
| --- | --- | --- | --- |
| **Care Pathway** | **Percent of Patients (n/N)** | **Care Pathway** | **Percent of Patients (n/N)** |
| ERàMED/SURGàICUàMED/SURGàdischarged | 25.6%  (17,871/69,903) | ERàMED/SURGàdischarged | 49.3%  (34,484/69,903) |
| ERàMED/SURGàICUàdischarged | 18.1%  (12,683/69,903) | ERàICUàMED/SURGàdischarged | 14.2% (9,904/69,903) |
| ERàMED/SURGàICUàexpired | 15.8%  (11,077/69,903) | ERàTELEMETRYàdischarged | 9.7%  (6,805/69,903) |
| MED/SURGàICUàMED/SURGàdischarged | 3.6%  (2,496/69,903) | MED/SURGàdischarged | 6.4% (4,477/69,903) |
| ERàTELEMETRYàICUàexpired | 3.3%  (2,276/69,903) | ERàMED/SURGàexpired | 3.7% (2,566/69,903) |
| ERàTELEMETRYàICUàTELEMETRYàdischarged | 3.0%  (2,102/69,903) | ICUàMED/SURGàdischarged | 3.4%  (2,346/69,903) |
| ERàTELEMETRYàICUàdischarged | 2.9% (2,011/69,903) | ERàICUàTELEMETRYàdischarged | 3.2% (2,264/69,903) |
| ERàMED/SURGàICUàTELEMETRYàdischarged | 2.3% (1,628/69,903) | ERàMED/SURGàTELEMETRYàdischarged | 1.6% (1,114/69,903) |
| MED/SURGàICUàdischarged | 2.3%  (1,597/69,903) | ERàICUàMED/SURGàexpired | 1.5%  (1,024/69,903) |
| ERàICUàMED/SURGàICUàMED/SURGàdischarged | 2.1% (1,487/69,903) | ERàTELEMETRYàMED/SURGàdischarged | 1.3% (943/69,903) |
| ERàMED/SURGàICUàMED/SURGàexpired | 1.9%  (1,345/69,903) | TELEMETRYàdischarged | 0.9% (602/69,903) |
| MED/SURGàICUàexpired | 1.8%  (1,289/69,903) | ERàTELEMETRYàexpired | 0.6%  (406/69,903) |
| ERàTELEMETRYàICUàMED/SURGàdischarged | 1.7%  (1,179/69,903) | ICUàTELEMETRYàdischarged | 0.6% (392/69,903) |
| ERàICUàMED/SURGàICUàdischarged | 1.5% (1,055/69,903) | MED/SURGàexpired | 0.4% (298/69,903) |
| ERàICUàMED/SURGàICUàexpired | 1.1%  (782/69,903) | ERàICUàTELEMETRYàMED/SURGà discharged | 0.4%  (258/69,903) |
| ERàMED/SURGàTELEMETRYàICUàexpired | 0.6%  (448/69,903) | ICUàMED/SURGàexpired | 0.3% (224/69,903) |
| ICUàMED/SURGàICUàMED/SURGàdischarged | 0.5%  (361/69,903) | ERàICUàMED/SURGàTELEMETRYà discharged | 0.3% (216/69,903) |
| ERàMED/SURGàICUàMED/SURGàICUàexpired | 0.4%  (299/69,903) | MED/SURGàERàMED/SURGàdischarged | 0.3% (202/69,903) |
| ERàMED/SURGàICUàMED/SURGàICUàMED/SURGà  discharged | 0.4%  (284/69,903) | ERàMED/SURGàTELEMETRYà MED/SURGà discharged | 0.3% (179/69,903) |
| ERàMED/SURGàICUàTELEMETRYàMED/SURGà  discharged | 0.4%  (281/69,903) | MED/SURGàTELEMETRYàdischarged | 0.1% (96/69,903) |
| ERàICUàTELEMETRYàICUàTELEMETRYàdischarged | 0.4%  (261/69,903) | ERàICUàTELEMETRYàexpired | 0.1% (92/69,903) |
| TELEMETRYàICUàTELEMETRYàdischarged | 0.4%  (251/69,903) | MED/SURGàERàdischarged | 0.1% (92/69,903) |
| ERàTELEMETRYàICUàTELEMETRYàMED/SURGà  discharged | 0.3%  (241/69,903) | ERàMED/SURGàTELEMETRYàexpired | 0.1% (90/69,903) |
| ERàICUàTELEMETRYàICUàexpired | 0.3%  (232/69,903) | TELEMETRYàMED/SURGàdischarged | 0.1% (83/69,903) |
| TELEMETRYàICUàdischarged | 0.3%  (227/69,903) | ERàTELEMETRYàMED/SURGàexpired | 0.1% (78/69,903) |

**Table S2**. Most common primary diagnoses for medical patients with and without unplanned ICU admission after matching.

| **Medical Patients with Unplanned ICU Admission** | | **Medical Patients without Unplanned ICU Admission** | |
| --- | --- | --- | --- |
| **ICD-10 Diagnosis Code - Description** | **Percent of Patients (n/N)** | **ICD-10 Diagnosis Code - Description** | **Percent of Patients (n/N)** |
| U07.1-COVID-19 | 19.7%  (13,771/69,903) | A41.9-SEPSIS UNSP ORGISM | 14.6% (10,220/69,903) |
| A41.9-SEPSIS UNSP ORGISM | 12.1%  (8,434/69,903) | U07.1-COVID-19 | 14.4%  (10,055/69,903) |
| A41.89-OTH SPEC SEPSIS | 7.8% (5,441/69,903) | A41.89-OTH SPEC SEPSIS | 4.8%  (3,371/69,903) |
| I13.0-HYPE HRT&CKD W HRT FLR&STG1-4CKD, UN | 3.2%  (2,236/69,903) | I13.0-HYPE HRT&CKD W HRT FLR&STG1-4CKD, UN | 3.3% (2,331/69,903) |
| I11.0-HTN HRT DZ W HRT FAIL | 1.9%  (1,315/69,903) | J96.01-AC RESP FAIL W HYPOXIA | 3.1% (2,148/69,903) |
| N17.9-AC KID FAIL UNSP | 1.4% (947/69,903) | J96.21-AC&CHR RESP FAIL W HYPOXIA | 2.1%  (1,445/69,903) |
| A41.51-SEPSIS D/T ESCHERICHIA COLI [E. COLI] | 1.3% (933/69,903) | I11.0-HTN HRT DZ W HRT FAIL | 1.8% (1,273/69,903) |
| J18.9-PN UNSP ORGISM | 1.3% (878/69,903) | A41.51-SEPSIS D/T ESCHERICHIA COLI [E. COLI] | 1.5%  (1,068/69,903) |
| J96.21-AC&CHR RESP FAIL W HYPOXIA | 1.2% (840/69,903) | N17.9-AC KID FAIL UNSP | 1.5%  (1,044/69,903) |
| J96.01-AC RESP FAIL W HYPOXIA | 1.0% (733/69,903) | J18.9-PN UNSP ORGISM | 1.3% (931/69,903) |
| F10.231-ALC DEP W WDRAWAL DELRUM | 0.9% (663/69,903) | J69.0-PNEUMONITIS D/T INHAL FOOD&VOMIT | 1.3%  (896/69,903) |
| J69.0-PNEUMONITIS D/T INHAL FOOD&VOMIT | 0.9% (597/69,903) | J44.1-CHRON OBSTR PULM DZ W/EXACERBATION | 0.9% (657/69,903) |
| I21.4-NON-ST ELEV (NSTEMI) MYCARD INFRC | 0.8% (544/69,903) | I21.4-NON-ST ELEV (NSTEMI) MYCARD INFRC | 0.9% (607/69,903) |
| A41.59-OTH GRAM-NEGATIVE SEPSIS | 0.7% (489/69,903) | J96.22-AC&CHR RESP FAIL W HYPERCAPNIA | 0.8%  (574/69,903) |
| J44.1-CHRON OBSTR PULM DZ W/EXACERBATION | 0.7% (479/69,903) | A41.59-OTH GRAM-NEGATIVE SEPSIS | 0.8% (530/69,903) |
| K70.31-ALCOHOLIC CIRRHOSIS LIVER W ASCITES | 0.6% (438/69,903) | F10.239-ALC DEP W WDRAWAL UNSP | 0.7% (474/69,903) |
| I13.2-HYPER HRT&CKD W HRT FLR&W STG 5 CKD | 0.6% (431/69,903) | K70.31-ALCOHOLIC CIRRHOSIS LIVER W ASCITES | 0.7% (464/69,903) |
| I26.99-OTH PULM EMBLSM WO AC COR PULMONALE | 0.6% (391/69,903) | I26.99-OTH PULM EMBLSM WO AC COR PULMONALE | 0.6%  (448/69,903) |
| A41.01-SEPSIS D/T METHCIL SUSCEPT STAPH AURS | 0.6% (390/69,903) | I63.9-CEREB INFRC UNSP | 0.6% (447/69,903) |
| I63.9-CEREB INFRC UNSP | 0.6%  (385/69,903) | I13.2-HYPER HRT&CKD W HRT FLR&W STG 5 CKD | 0.6% (442/69,903) |
| A41.02-SEPSIS D/T METHCIL RESISTANT STAPH AURS | 0.5%  (382/69,903) | A41.02-SEPSIS D/T METHCIL RESISTANT STAPH AURS | 0.5% (379/69,903) |
| N17.0-AC KID FAIL W TUBLR NECR | 0.5%  (375/69,903) | J96.02-AC RESP FAIL W HYPERCAPNIA | 0.5% (348/69,903) |
| E11.10-TYPE 2 DIAB MEL W KETOACIDOSIS WO COMA | 0.5%  (373/69,903) | A41.01-SEPSIS D/T METHCIL SUSCEPT STAPH AURS | 0.5% (318/69,903) |
| F10.239-ALC DEP W WDRAWAL UNSP | 0.5%  (332/69,903) | A41.50-GRAM-NEGATIVE SEPSIS UNSP | 0.4% (302/69,903) |
| J96.22-AC&CHR RESP FAIL W HYPERCAPNIA | 0.5%  (315/69,903) | K85.90-AC PANCREATITIS WO NECR OR INFCT UNSP | 0.4% (297/69,903) |

**Table S3**. Most common patient care pathways for surgical patients with and without unplanned ICU admission after matching.

| **Surgical Patients with Unplanned ICU Admission** | | **Surgical Patients without Unplanned ICU Admission** | |
| --- | --- | --- | --- |
| **Care Pathway** | **Percent of Patients (n/N)** | **Care Pathway** | **Percent of Patients (n/N)** |
| ERàMED/SURGàICUàSURGERYàICUàdischarged | 5.1%  (625/12,321) | ERàMED/SURGàSURGERYàMED/SURGàdischarged | 21.2% (2,618/12,321) |
| ERàMED/SURGàICUàSURGERYàICUàMED/SURGà  discharged | 4.8%  (592/12,321) | SURGERYàMED/SURGàdischarged | 9.9%  (1,225/12,321) |
| SURGERYàMED/SURGàICUàMED/SURGàdischarged | 4.8%  (586/12,321) | ERàSURGERYàMED/SURGàdischarged | 9.9%  (1,217/12,321) |
| ERàMED/SURGàSURGERYàMED/SURGàICUà  MED/SURGàdischarged | 4.3% (529/12,321) | MED/SURGàSURGERYàMED/SURGàdischarged | 5.4% (662/12,321) |
| ERàMED/SURGàICUàMED/SURGàSURGERYà  MED/SURGàdischarged | 3.7% (458/12,321) | ERàICUàSURGERYàICUàMED/SURGàdischarged | 4.2%  (522/12,321) |
| SURGERYàMED/SURGàICUàdischarged | 2.7%  (331/12,321) | ERàSURGERYàICUàMED/SURGàdischarged | 3.9%  (480/12,321) |
| ERàSURGERYàMED/SURGàICUàMED/SURGàdischarged | 2.4% (300/12,321) | ERàTELEMETRYàSURGERYàTELEMETRYàdischarged | 3.0%  (373/12,321) |
| ERàMED/SURGàICUàSURGERYàICUàexpired | 2.4% (298/12,321) | SURGERYàICUàMED/SURGàdischarged | 2.6%  (321/12,321) |
| ERàMED/SURGàSURGERYàMED/SURGàICUàdischarged | 2.4% (296/12,321) | ERàMED/SURGàSURGERYàdischarged | 2.1% (257/12,321) |
| ERàMED/SURGàSURGERYàMED/SURGàICUàexpired | 2.4% (290/12,321) | ERàMED/SURGàSURGERYàICUàMED/SURGà discharged | 2.0% (250/12,321) |
| ERàSURGERYàMED/SURGàICUàdischarged | 1.6% (195/12,321) | ERàMED/SURGàSURGERYàMED/SURGàSURGERYàMED/SURGàdischarged | 2.0% (248/12,321) |
| ERàMED/SURGàICUàSURGERYàMED/SURGàdischarged | 1.5%  (188/12,321) | ERàICUàMED/SURGàSURGERYàMED/SURGàdischarged | 1.8%  (218/12,321) |
| ERàMED/SURGàICUàSURGERYàdischarged | 1.4%  (178/12,321) | ICUàSURGERYàICUàMED/SURGàdischarged | 1.3% (165/12,321) |
| MED/SURGàSURGERYàMED/SURGàICUàMED/SURGàdischarged | 1.4% (178/12,321) | ERàSURGERYàMED/SURGàSURGERYàMED/SURGàdischarged | 1.1%  (141/12,321) |
| ERàSURGERYàICUàMED/SURGàICUàMED/SURGàdischarged | 1.2% (145/12,321) | ERàMED/SURGàSURGERYàICUàdischarged | 1.1%  (135/12,321) |
| SURGERYàICUàMED/SURGàICUàMED/SURGàdischarged | 1.2%  (144/12,321) | ERàSURGERYàTELEMETRYàdischarged | 1.0% (119/12,321) |
| MED/SURGàICUàSURGERYàICUàMED/SURGàdischarged | 1.1% (141/12,321) | ERàMED/SURGàSURGERYàMED/SURGàexpired | 0.7%  (87/12,321) |
| MED/SURGàICUàSURGERYàICUàdischarged | 0.9% (112/12,321) | MED/SURGàSURGERYàICUàMED/SURGàdischarged | 0.7% (85/12,321) |
| MED/SURGàICUàMED/SURGàSURGERYàMED/SURGàdischarged | 0.8%  (103/12,321) | ERàSURGERYàICUàSURGERYàICUàMED/SURGàdischarged | 0.7% (81/12,321) |
| SURGERYàMED/SURGàICUàexpired | 0.8% (102/12,321) | SURGERYàTELEMETRYàdischarged | 0.6% (80/12,321) |
| ERàSURGERYàMED/SURGàICUàexpired | 0.7%  (92/12,321) | ERàICUàSURGERYàICUàTELEMETRYàdischarged | 0.6% (77/12,321) |
| ERàTELEMETRYàICUàSURGERYàICUàdischarged | 0.7%  (91/12,321) | SURGERYàMED/SURGàSURGERYàMED/SURGàdischarged | 0.6% (71/12,321) |
| ERàICUàSURGERYàICUàMED/SURGàICUàMED/SURGàdischarged | 0.7%  (89/12,321) | ERàSURGERYàICUàTELEMETRYàdischarged | 0.5% (67/12,321) |
| MED/SURGàSURGERYàMED/SURGàICUàdischarged | 0.7% (84/12,321) | ERàICUàSURGERYàMED/SURGàdischarged | 0.5% (61/12,321) |
| ERàSURGERYàICUàMED/SURGàICUàdischarged | 0.6%  (78/12,321) | ERàMED/SURGàSURGERYàICUàexpired | 0.5% (59/12,321) |

**Table S4**. Most common primary diagnoses for surgical patients with and without unplanned ICU admission after matching.

| **Surgical Patients with Unplanned ICU Admission** | | **Surgical Patients without Unplanned ICU Admission** | |
| --- | --- | --- | --- |
| **ICD-10 Diagnosis Code - Description** | **Percent of Patients (n/N)** | **ICD-10 Diagnosis Code - Description** | **Percent of Patients (n/N)** |
| A41.9-SEPSIS UNSP ORGISM | 12.5%  (1,541/12,321) | A41.9-SEPSIS UNSP ORGISM | 13.8%  (1,695/12,321) |
| U07.1-COVID-19 | 3.5%  (430/12,321) | A41.51-SEPSIS D/T ESCHERICHIA COLI [E. COLI] | 1.7%  (211/12,321) |
| A41.89-OTH SPEC SEPSIS | 2.8% (341/12,321) | A41.89-OTH SPEC SEPSIS | 1.5%  (179/12,321) |
| A41.51-SEPSIS D/T ESCHERICHIA COLI [E. COLI] | 1.5% (188/12,321) | E11.52-TYP 2 DM W DBTC PERIP ANGIOP W GNGR | 1.4%  (167/12,321) |
| A41.02-SEPSIS D/T METHCIL RESISTANT STAPH AURS | 1.2%  (154/12,321) | U07.1-COVID-19 | 1.2%  (151/12,321) |
| E11.52-TYP 2 DM W DBTC PERIP ANGIOP W GNGR | 1.1% (137/12,321) | S72.142A-DISPL INTRTROC FX L FEMR INIT CLOSED FX | 1.2% (150/12,321) |
| S72.142A-DISPL INTRTROC FX L FEMR INIT CLOSED FX | 1.1%  (134/12,321) | S72.141A-DISPL INTRTROC FX R FEMR INIT CLOSED FX | 1.1%  (130/12,321) |
| A41.01-SEPSIS D/T METHCIL SUSCEPT STAPH AURS | 1.0%  (128/12,321) | A41.59-OTH GRAM-NEGATIVE SEPSIS | 1.0%  (126/12,321) |
| S72.141A-DISPL INTRTROC FX R FEMR INIT CLOSED FX | 0.9% (109/12,321) | A41.01-SEPSIS D/T METHCIL SUSCEPT STAPH AURS | 1.0% (122/12,321) |
| N17.9-AC KID FAIL UNSP | 0.9% (106/12,321) | K57.20-DVTRCLI LG INTEST W PERF&ABCS WO BLED | 1.0%  (119/12,321) |
| A41.59-OTH GRAM-NEGATIVE SEPSIS | 0.8%  (102/12,321) | A41.02-SEPSIS D/T METHCIL RESISTANT STAPH AURS | 0.9%  (112/12,321) |
| S06.5X9A-TRM SUBDR HEMRG W LOC UNSP DURATION INIT | 0.8% (100/12,321) | J96.01-AC RESP FAIL W HYPOXIA  J96.01-AC RESP FAIL W HYPOXIA | 0.9%  (106/12,321) |
| K57.20-DVTRCLI LG INTEST W PERF&ABCS WO BLED | 0.8% (94/12,321) | E11.69-TYPE 2 DIAB MEL W OTH SPEC COMP | 0.9% (105/12,321) |
| E11.69-TYPE 2 DIAB MEL W OTH SPEC COMP | 0.7%  (91/12,321) | C79.31-SEC MALIGNANT NEOPLM BRAIN | 0.8% (94/12,321) |
| K56.50-INT ADHE, UNSP PART VS COMPL OBST | 0.6%  (75/12,321) | N17.9-AC KID FAIL UNSP | 0.7%  (85/12,321) |
| I13.0-HYPE HRT&CKD W HRT FLR&STG1-4CKD, UN | 0.6%  (68/12,321) | S06.5X9A-TRM SUBDR HEMRG W LOC UNSP DURATION INIT | 0.6%  (78/12,321) |
| C79.31-SEC MALIGNANT NEOPLM BRAIN | 0.5%  (65/12,321) | K56.50-INT ADHE, UNSP PART VS COMPL OBST | 0.6% (75/12,321) |
| S06.5X0A-TRM SUBDR HEMRG WO LOC INIT | 0.5% (65/12,321) | J69.0-PNEUMONITIS D/T INHAL FOOD&VOMIT | 0.6% (74/12,321) |
| S72.001A-FX UNSP PART NCK R FEMR INIT CLOSED FX | 0.5%  (59/12,321) | J96.21-AC&CHR RESP FAIL W HYPOXIA | 0.6% (68/12,321) |
| J69.0-PNEUMONITIS D/T INHAL FOOD&VOMIT | 0.5% (57/12,321) | O34.211-MATRNL CAR LO TRNSV SCAR CESARN DEL | 0.5% (61/12,321) |
| A41.81-SEPSIS D/T ENTEROCOCCUS | 0.4% (55/12,321) | C18.2-MALIGNANT NEOPLM ASC CLN | 0.5% (58/12,321) |
| D32.0-BENIGN NEOPLM CEREB MENINGES | 0.4%  (55/12,321) | I13.0-HYPE HRT&CKD W HRT FLR&STG1-4CKD, UN | 0.5% (58/12,321) |
| M48.02-SP STEN CERV RGN | 0.4%  (55/12,321) | S06.5X0A-TRM SUBDR HEMRG WO LOC INIT | 0.5% (58/12,321) |
| C18.2-MALIGNANT NEOPLM ASC CLN | 0.4%  (54/12,321) | A41.50-GRAM-NEGATIVE SEPSIS UNSP | 0.4% (53/12,321) |
| J96.01-AC RESP FAIL W HYPOXIA | 0.4%  (53/12,321) | I13.2-HYPER HRT&CKD W HRT FLR&W STG 5 CKD | 0.4% (53/12,321) |

**Table S5**. Distribution of CCI comorbidities for medical patients with and without unplanned ICU admission before risk adjustment matching.

|  | **With Unplanned ICU Admission**  **(N=71,296)** | | **Without Unplanned ICU Admission (N=2,784,626)** | |  | **Comparison of Unplanned ICU Admission to No Unplanned ICU Admissiona** | | | |
| --- | --- | --- | --- | --- | --- | --- | --- | --- | --- |
| **Patient Comorbidities** | **Number of Patients** | **Percent of Patients** | **Number of Patients** | **Percent of Patients** | **p-valueb** | **Odds Ratio** | **95% CI** | | **p-valueb** |
| Acquired Immune Deficiency Disease | 349 | 0% | 9,448 | 0% | <0.0001 | 1.476 | 1.325 | 1.645 | <0.0001 |
| Cancer (without metastasis) | 4,983 | 7% | 143,491 | 5% | <0.0001 | 1.294 | 1.256 | 1.334 | <0.0001 |
| Congestive Heart Failure | 25,597 | 36% | 590,106 | 21% | <0.0001 | 1.379 | 1.354 | 1.405 | <0.0001 |
| Chronic Obstructive Pulmonary Disease | 23,404 | 33% | 671,368 | 24% | <0.0001 | 1.209 | 1.189 | 1.229 | <0.0001 |
| Cerebrovascular Disease | 8,713 | 12% | 214,643 | 8% | <0.0001 | 1.352 | 1.318 | 1.386 | <0.0001 |
| Dementia | 6,126 | 9% | 231,053 | 8% | 0.0048 | 0.939 | 0.913 | 0.965 | <0.0001 |
| Diabetes (without complications) | 13,076 | 18% | 394,705 | 14% | <0.0001 | 1.246 | 1.220 | 1.273 | <0.0001 |
| Diabetes (with complications) | 17,202 | 24% | 443,236 | 16% | <0.0001 | 1.015 | 0.993 | 1.037 | 0.182 |
| Metastatic Solid Tumor | 3,570 | 5% | 100,205 | 4% | <0.0001 | 1.434 | 1.385 | 1.485 | <0.0001 |
| Myocardial Infarction | 11,358 | 16% | 244,482 | 9% | <0.0001 | 1.335 | 1.306 | 1.364 | <0.0001 |
| Mild Liver Disease | 6,095 | 9% | 155,044 | 6% | <0.0001 | 1.461 | 1.422 | 1.501 | <0.0001 |
| Moderate/Severe Liver Disease | 3,919 | 5% | 59,884 | 2% | <0.0001 | 2.480 | 2.397 | 2.566 | <0.0001 |
| Paralysis | 3,137 | 4% | 66,804 | 2% | <0.0001 | 1.526 | 1.467 | 1.588 | <0.0001 |
| Peptic Ulcer Disease | 2,221 | 3% | 44,470 | 2% | <0.0001 | 1.652 | 1.581 | 1.726 | <0.0001 |
| Peripheral Vascular Disease | 8,010 | 11% | 196,693 | 7% | <0.0001 | 1.127 | 1.099 | 1.155 | <0.0001 |
| Renal Disease | 23,181 | 33% | 581,475 | 21% | <0.0001 | 1.289 | 1.262 | 1.316 | <0.0001 |
| Rheumatic Disease | 2,847 | 4% | 85,048 | 3% | <0.0001 | 1.212 | 1.166 | 1.26 | <0.0001 |

aReference group for each comorbidity is the group of patients without the comorbidity; bChi-square test was used to calculate p-value

Abbreviations: CI = confidence interval; CCI = Charlson Comorbidity Index; ICU = intensive care unit

**Table S6**. Medical patient and hospital characteristics after risk adjustment matching.

|  | **With Unplanned ICU Admission**  **(N=69,903)** | | **Without Unplanned ICU Admission (N=69,903)** | |  | **Comparison of Unplanned ICU Admission to No Unplanned ICU Admission** | | | | |
| --- | --- | --- | --- | --- | --- | --- | --- | --- | --- | --- |
| **Patient Characteristics** | **Number of Patients** | **Percent of Patients** | **Number of Patients** | **Percent of Patients** | **p-valuea** | **Odds Ratio** | **95% CI** | | **p-valuea** | |
| **Age category** |  |  |  |  |  |  |  | |  | |
| < 65 years | 31,588 | 45% | 31,740 | 45% | 0.4141 | *Reference Group* | | | | |
| ≥ 65 years | 38,315 | 55% | 38,163 | 55% | 1.079 | 1.047 | 1.112 | | <0.0001 |
| **Sex** |  |  |  |  |  |  |  |  | |  |
| Male | 37,314 | 53% | 37,466 | 54% | 0.4151 | 0.988 | 0.967 | 1.009 | | 0.2708 |
| Female | 32,589 | 47% | 32,437 | 46% | *Reference Group* | | | | |
| **Race** |  |  |  |  |  |  |  |  | |  |
| Black | 11,453 | 16% | 11,797 | 17% | 0.0044 | 0.989 | 0.961 | 1.019 | | 0.4704 |
| White | 50,867 | 73% | 50,850 | 73% | *Reference Group* | | | | |
| Other | 4,304 | 6% | 4,172 | 6% | 1.05 | 1.004 | 1.099 | | 0.0325 |
| Unspecified | 3,279 | 5% | 3,084 | 4% | 1.088 | 1.033 | 1.146 | | 0.0013 |
| **Insurance Type** |  |  |  |  |  |  |  |  | |  |
| Medicaid | 10,593 | 15% | 10,859 | 16% | <0.0001 | 1.044 | 1.005 | 1.084 | | 0.0268 |
| Commercial | 12,632 | 18% | 11,892 | 17% | 1.122 | 1.083 | 1.162 | | <0.0001 |
| Uninsured | 2,259 | 3% | 2,198 | 3% | 1.096 | 1.027 | 1.17 | | 0.006 |
| Other insurance | 2,455 | 4% | 2,317 | 3% | 1.098 | 1.034 | 1.166 | | 0.0022 |
| Medicare | 41,964 | 60% | 42,637 | 61% | *Reference Group* | | | | |
| **Admission Type** |  |  |  |  |  |  |  |  | |  |
| Elective | 1,873 | 3% | 1,792 | 3% | 0.175 | *Reference Group* | | | | |
| Urgent/Emergent | 68,030 | 97% | 68,111 | 97% | 0.967 | 0.905 | 1.033 | | 0.3174 |
| **CCI Category** |  |  |  |  |  |  | | | | |
| 0 | 8,836 | 13% | 8,474 | 12% | 0.104 | *Reference Group* | | | | |
| 1 | 11,756 | 17% | 11,732 | 17% | 0.963 | 0.925 | 1.002 | 0.0594 | |
| 2 | 10,205 | 15% | 10,268 | 15% | 0.959 | 0.92 | 0.999 | 0.0463 | |
| 3 | 9,212 | 13% | 9,293 | 13% | 0.961 | 0.921 | 1.002 | 0.0649 | |
| 4 | 7,988 | 11% | 8,049 | 12% | 0.961 | 0.92 | 1.005 | 0.0793 | |
| ≥5 | 21,906 | 31% | 22,087 | 32% | 0.959 | 0.924 | 0.996 | 0.0285 | |
| **Obstructive Sleep Apnea/Sleep Disordered Breathing** |  |  |  |  |  |  |  |  |  | |
| Yes | 10,200 | 15% | 9,648 | 14% | <0.0001 | 1.054 | 1.021 | 1.087 | 0.0012 | |
| No | 59,703 | 85% | 60,255 | 86% | *Reference Group* | | | | |
| **Obesity** |  |  |  |  |  |  |  |  |  | |
| Yes | 21,546 | 31% | 20,578 | 29% | <0.0001 | 1.058 | 1.032 | 1.083 | <0.0001 | |
| No | 48,357 | 69% | 49,325 | 71% | *Reference Group* | | | | |
| **Opioid Naïve** |  |  |  |  |  |  |  |  |  | |
| Yes | 66,220 | 95% | 66,467 | 95% | 0.003 | *Reference Group* | | | | |
| No | 3,683 | 5% | 3,436 | 5% | 1.094 | 1.043 | 1.148 | 0.0002 | |
| **Hospital Characteristics** |  |  |  |  |  | **Hospital Characteristics** | | | | |
| **Hospital Region** |  |  |  |  |  |  |  |  | |  |
| South | 35,387 | 51% | 35,120 | 50% | 0.194 | 1.003 | 0.976 | 1.03 | | 0.8382 |
| Northeast | 10,410 | 15% | 10,689 | 15% | 0.977 | 0.942 | 1.012 | | 0.1911 |
| Midwest | 16,041 | 23% | 16,041 | 23% | *Reference Group* | | | | |
| West | 8,065 | 12% | 8,053 | 12% | 0.982 | 0.945 | 1.021 | | 0.3555 |
| **Teaching Hospital** |  |  |  |  |  |  |  |  | |  |
| Teaching Hospital | 36,011 | 52% | 36,649 | 52% | 0.0006 | 1 | 0.975 | 1.026 | | 0.9973 |
| Non-Teaching Hospital | 33,892 | 48% | 33,254 | 48% | *Reference Group* | | | | |
| **Bed Size** |  |  |  |  |  |  |  |  | |  |
| ≥500 beds | 24,264 | 35% | 25,225 | 36% | <0.0001 | 0.94 | 0.912 | 0.969 | | <0.0001 |
| 300-500 | 20,984 | 30% | 20,790 | 30% | 0.984 | 0.957 | 1.011 | | 0.2428 |
| <300 | 24,655 | 35% | 23,888 | 34% | *Reference Group* | | | | |
| **Urban vs rural** |  |  |  |  |  |  |  |  | |  |
| Urban | 59,701 | 85% | 60,099 | 86% | 0.002 | 0.977 | 0.947 | 1.009 | | 0.1541 |
| Rural | 10,202 | 15% | 9,804 | 14% | *Reference Group* | | | | |

aChi-square test was used to calculate p-value

Abbreviations: CI = confidence interval; CCI = Charlson Comorbidity Index; ICU = intensive care unit

**Table S7**. Distribution of CCI comorbidities for surgical patients with and without unplanned ICU admission before risk adjustment matching.

|  | **With Unplanned ICU Admission (N=12,356)** | | **Without Unplanned ICU Admission (N=938,846)** | |  | **Comparison of Unplanned ICU Admission to No Unplanned ICU Admissiona** | | | |
| --- | --- | --- | --- | --- | --- | --- | --- | --- | --- |
| **Patient Comorbidities** | **Number of Patients** | **Percent of Patients** | **Number of Patients** | **Percent of Patients** | **p-valueb** | **Odds Ratio** | **95% CI** | | **p-valueb** |
| Acquired Immune Deficiency Disease | 76 | 1% | 1,723 | 0% | <0.0001 | 1.991 | 1.568 | 2.528 | <0.0001 |
| Cancer (without metastasis) | 1,389 | 11% | 61,682 | 7% | <0.0001 | 1.75 | 1.65 | 1.856 | <0.0001 |
| Congestive Heart Failure | 4,043 | 33% | 84,734 | 9% | <0.0001 | 2.012 | 1.922 | 2.107 | <0.0001 |
| Chronic Obstructive Pulmonary Disease | 3,911 | 32% | 161,093 | 17% | <0.0001 | 1.482 | 1.423 | 1.544 | <0.0001 |
| Cerebrovascular Disease | 1,779 | 14% | 33,579 | 4% | <0.0001 | 2.134 | 2.017 | 2.257 | <0.0001 |
| Dementia | 1,013 | 8% | 37,210 | 4% | <0.0001 | 1.122 | 1.047 | 1.202 | 0.0011 |
| Diabetes (without complications) | 1,770 | 14% | 105,857 | 11% | <0.0001 | 1.235 | 1.168 | 1.306 | <0.0001 |
| Diabetes (with complications) | 3,358 | 27% | 114,187 | 12% | <0.0001 | 1.025 | 0.974 | 1.078 | 0.3452 |
| Metastatic Solid Tumor | 920 | 7% | 31,874 | 3% | <0.0001 | 2.082 | 1.94 | 2.235 | <0.0001 |
| Myocardial Infarction | 1,945 | 16% | 45,232 | 5% | <0.0001 | 1.434 | 1.358 | 1.514 | <0.0001 |
| Mild Liver Disease | 928 | 8% | 39,084 | 4% | <0.0001 | 1.433 | 1.337 | 1.537 | <0.0001 |
| Moderate/Severe Liver Disease | 454 | 4% | 5,970 | 1% | <0.0001 | 3.277 | 2.96 | 3.627 | <0.0001 |
| Paralysis | 834 | 7% | 14,435 | 2% | <0.0001 | 2.453 | 2.268 | 2.652 | <0.0001 |
| Peptic Ulcer Disease | 835 | 7% | 12,182 | 1% | <0.0001 | 3.097 | 2.872 | 3.341 | <0.0001 |
| Peripheral Vascular Disease | 2,071 | 17% | 62,761 | 7% | <0.0001 | 1.197 | 1.136 | 1.26 | <0.0001 |
| Renal Disease | 4,068 | 33% | 119,459 | 13% | <0.0001 | 1.436 | 1.366 | 1.509 | <0.0001 |
| Rheumatic Disease | 541 | 4% | 25,414 | 3% | <0.0001 | 1.317 | 1.204 | 1.44 | <0.0001 |

aReference group for each comorbidity is the group of patients without the comorbidity; bChi-square test was used to calculate p-value

Abbreviations: CI = confidence interval; CCI = Charlson Comorbidity Index; ICU = intensive care unit

**Table S8**. Surgical patient and hospital characteristics after risk adjustment matching.

|  | **With Unplanned ICU Admission (N=12,321)** | | **Without Unplanned ICU Admission**  **(N=12,321)** | |  | **Comparison of Unplanned ICU Admission to No Unplanned ICU Admission** | | | | |
| --- | --- | --- | --- | --- | --- | --- | --- | --- | --- | --- |
| **Patient Characteristics** | **Number of Patients** | **Percent of Patients** | **Number of Patients** | **Percent of Patients** | **p-valuea** | **Odds Ratio** | **95% CI** | | **p-valuea** | |
| **Age category** |  |  |  |  |  |  |  | |  | |
| < 65 years | 5,422 | 44% | 5,428 | 44% | 0.9386 | *Reference Group* | | | | |
| ≥ 65 years | 6,899 | 56% | 6,893 | 56% | 1.0 | 1.0 | 1.1 | | 0.479 |
| **Sex** |  |  |  |  |  |  |  |  | |  |
| Male | 6,529 | 53% | 6,584 | 53% | 0.483 | 1.0 | 0.9 | 1.0 | | 0.628 |
| Female | 5,792 | 47% | 5,737 | 47% | *Reference Group* | | | | |
| **Race** |  |  |  |  |  |  |  |  | |  |
| Black | 2,047 | 17% | 1,999 | 16% | 0.406 | 1.1 | 1.0 | 1.1 | | 0.126 |
| White | 8,918 | 72% | 9,031 | 73% | *Reference Group* | | | | |
| Other | 829 | 7% | 785 | 6% | 1.1 | 1.0 | 1.3 | | 0.017 |
| Unspecified | 527 | 4% | 506 | 4% | 1.1 | 1.0 | 1.3 | | 0.060 |
| **Insurance Type** |  |  |  |  |  |  |  |  | |  |
| Medicaid | 1,738 | 14% | 1,793 | 15% | 0.007 | 1.0 | 0.9 | 1.1 | | 0.785 |
| Commercial | 2,183 | 18% | 2,094 | 17% | 1.1 | 1.0 | 1.2 | | 0.089 |
| Uninsured | 281 | 2% | 341 | 3% | 0.9 | 0.7 | 1.0 | | 0.083 |
| Other insurance | 435 | 4% | 369 | 3% | 1.2 | 1.0 | 1.4 | | 0.010 |
| Medicare | 7,684 | 62% | 7,724 | 63% | *Reference Group* | | | | |
| **Admission Type** |  |  |  |  |  |  |  |  | |  |
| Elective | 2,013 | 16% | 1,796 | 15% | 0.0001 | *Reference Group* | | | | |
| Urgent/Emergent | 10,308 | 84% | 10,525 | 85% | 0.9 | 0.8 | 0.9 | | 0.0002 |
| **CCI Category** |  |  |  |  |  |  | | | | |
| 0 | 1,460 | 12% | 1,523 | 12% | 0.174 | *Reference Group* | | | | |
| 1 | 1,673 | 14% | 1,783 | 14% | 1.0 | 0.9 | 1.1 | 0.762 | |
| 2 | 1,824 | 15% | 1,807 | 15% | 1.1 | 1.0 | 1.2 | 0.270 | |
| 3 | 1,556 | 13% | 1,497 | 12% | 1.1 | 1.0 | 1.2 | 0.085 | |
| 4 | 1,409 | 11% | 1,427 | 12% | 1.0 | 0.9 | 1.1 | 0.552 | |
| ≥5 | 4,399 | 36% | 4,284 | 35% | 1.1 | 1.0 | 1.2 | 0.127 | |
| **Obstructive Sleep Apnea/Sleep Disordered Breathing** |  |  |  |  |  |  |  |  |  | |
| Yes | 1,735 | 14% | 1,503 | 12% | <0.0001 | 1.1 | 1.0 | 1.2 | 0.005 | |
| No | 10,586 | 86% | 10,818 | 88% | *Reference Group* | | | | |
| **Obesity** |  |  |  |  |  |  |  |  |  | |
| Yes | 3,524 | 29% | 3,182 | 26% | <0.0001 | 1.1 | 1.0 | 1.2 | 0.0006 | |
| No | 8,797 | 71% | 9,139 | 74% | *Reference Group* | | | | |
| **Opioid Naïve** |  |  |  |  |  |  |  |  |  | |
| Yes | 11,594 | 94% | 11,652 | 95% | 0.110 | *Reference Group* | | | | |
| No | 727 | 6% | 669 | 5% | 1.1 | 1.0 | 1.2 | 0.069 | |
| **Hospital Characteristics** |  |  |  |  |  | **Hospital Characteristics** | | | | |
| **Hospital Region** |  |  |  |  |  |  |  |  | |  |
| South | 6,327 | 51% | 6,086 | 49% | 0.003 | 1.0 | 1.0 | 1.1 | | 0.152 |
| Northeast | 1,822 | 15% | 1,986 | 16% | 0.9 | 0.9 | 1.0 | | 0.079 |
| Midwest | 2,878 | 23% | 2,882 | 23% | *Reference Group* | | | | |
| West | 1,294 | 11% | 1,367 | 11% | 0.9 | 0.8 | 1.0 | | 0.121 |
| **Teaching Hospital** |  |  |  |  |  |  |  |  | |  |
| Teaching Hospital | 7,059 | 57% | 7,289 | 59% | 0.003 | 1.0 | 0.9 | 1.0 | | 0.413 |
| Non-Teaching Hospital | 5,262 | 43% | 5,032 | 41% | *Reference Group* | | | | |
| **Bed Size** |  |  |  |  |  |  |  |  | |  |
| ≥500 beds | 5,169 | 42% | 5,390 | 44% | 0.005 | 0.9 | 0.8 | 1.0 | | 0.0126 |
| 300-500 | 3,701 | 30% | 3,678 | 30% | 1.0 | 0.9 | 1.0 | | 0.174 |
| <300 | 3,451 | 28% | 3,253 | 26% | *Reference Group* | | | | |
| **Urban vs rural** |  |  |  |  |  |  |  |  | |  |
| Urban | 10,967 | 89% | 11,057 | 90% | 0.063 | 1.0 | 0.9 | 1.1 | | 0.805 |
| Rural | 1,354 | 11% | 1,264 | 10% | *Reference Group* | | | | |

aChi-square test was used to calculate p-value

Abbreviations: CI = confidence interval; CCI = Charlson Comorbidity Index; ICU = intensive care unit
